# Supplementary material for: The familial risk of infection-related hospitalization in children: A population-based sibling study
Source: PubMed Central journal article supplement (PMC8081236; doi:10.1371/journal.pone.0250181), 2021-04-28

# PLOS ONE

## The familial risk of infection-related hospitalization: a population-based sibling study --Manuscript Draft--

|                                                                                                                               |                                                                                                                                                                                                                                                                                                                                                                                                                                                                                                                                                                                                                                                                                                                                                                                                                                                                                                                                                                                                                                                                                                                                                                                                                                                                                                                                                                                                                                                                                                                                                                                                                                                                                                                                                                                                                                                                                                                                                                                                                                                                                                                                                                                                                                                                                                                                   |
|-------------------------------------------------------------------------------------------------------------------------------|-----------------------------------------------------------------------------------------------------------------------------------------------------------------------------------------------------------------------------------------------------------------------------------------------------------------------------------------------------------------------------------------------------------------------------------------------------------------------------------------------------------------------------------------------------------------------------------------------------------------------------------------------------------------------------------------------------------------------------------------------------------------------------------------------------------------------------------------------------------------------------------------------------------------------------------------------------------------------------------------------------------------------------------------------------------------------------------------------------------------------------------------------------------------------------------------------------------------------------------------------------------------------------------------------------------------------------------------------------------------------------------------------------------------------------------------------------------------------------------------------------------------------------------------------------------------------------------------------------------------------------------------------------------------------------------------------------------------------------------------------------------------------------------------------------------------------------------------------------------------------------------------------------------------------------------------------------------------------------------------------------------------------------------------------------------------------------------------------------------------------------------------------------------------------------------------------------------------------------------------------------------------------------------------------------------------------------------|
| <b>Manuscript Number:</b>                                                                                                     | PONE-D-20-33021                                                                                                                                                                                                                                                                                                                                                                                                                                                                                                                                                                                                                                                                                                                                                                                                                                                                                                                                                                                                                                                                                                                                                                                                                                                                                                                                                                                                                                                                                                                                                                                                                                                                                                                                                                                                                                                                                                                                                                                                                                                                                                                                                                                                                                                                                                                   |
| <b>Article Type:</b>                                                                                                          | Research Article                                                                                                                                                                                                                                                                                                                                                                                                                                                                                                                                                                                                                                                                                                                                                                                                                                                                                                                                                                                                                                                                                                                                                                                                                                                                                                                                                                                                                                                                                                                                                                                                                                                                                                                                                                                                                                                                                                                                                                                                                                                                                                                                                                                                                                                                                                                  |
| <b>Full Title:</b>                                                                                                            | The familial risk of infection-related hospitalization: a population-based sibling study                                                                                                                                                                                                                                                                                                                                                                                                                                                                                                                                                                                                                                                                                                                                                                                                                                                                                                                                                                                                                                                                                                                                                                                                                                                                                                                                                                                                                                                                                                                                                                                                                                                                                                                                                                                                                                                                                                                                                                                                                                                                                                                                                                                                                                          |
| <b>Short Title:</b>                                                                                                           | Sibling risk of infection-related hospitalization                                                                                                                                                                                                                                                                                                                                                                                                                                                                                                                                                                                                                                                                                                                                                                                                                                                                                                                                                                                                                                                                                                                                                                                                                                                                                                                                                                                                                                                                                                                                                                                                                                                                                                                                                                                                                                                                                                                                                                                                                                                                                                                                                                                                                                                                                 |
| <b>Corresponding Author:</b>                                                                                                  | Jessica E. Miller, Ph.D<br>Murdoch Children's Research Institute<br>Parkville, Victoria AUSTRALIA                                                                                                                                                                                                                                                                                                                                                                                                                                                                                                                                                                                                                                                                                                                                                                                                                                                                                                                                                                                                                                                                                                                                                                                                                                                                                                                                                                                                                                                                                                                                                                                                                                                                                                                                                                                                                                                                                                                                                                                                                                                                                                                                                                                                                                 |
| <b>Keywords:</b>                                                                                                              | siblings; childhood infection; infection-related hospitalization; pediatrics                                                                                                                                                                                                                                                                                                                                                                                                                                                                                                                                                                                                                                                                                                                                                                                                                                                                                                                                                                                                                                                                                                                                                                                                                                                                                                                                                                                                                                                                                                                                                                                                                                                                                                                                                                                                                                                                                                                                                                                                                                                                                                                                                                                                                                                      |
| <b>Abstract:</b>                                                                                                              | <p><b>Objective:</b> To assess the risk of severe childhood infections within families, we conducted a sibling analysis in a population-based cohort study with genealogical linkage. We investigated the sibling risk of hospitalization with common infections, a marker of severity. We hypothesized that having siblings hospitalized for infection would increase the proband's subsequent risk of admission with infection.</p> <p><b>Study design:</b> We used population data on Western Australian live-born singletons and their siblings between 1980 and 2014. Measures of infection were infection-related hospitalizations from discharge diagnostic codes. Exposure was having a sibling who had an infection-related hospitalization. Outcomes were infection-related hospitalizations in the child/proband. Probands were followed until an infection-related hospitalization admission (up to the first three), death, 18th birthday, or end of 2014, whichever occurred first. Infection risks were estimated by adjusted Cox proportional hazard models for multiple events.</p> <p><b>Results:</b> Of 512,279 probands, 142,915 (27.9%) had infection-related hospitalizations; 133,322 (26.0%) had a sibling with a previous infection-related hospitalization (i.e. exposed). Median interval between sibling and proband infection-related hospitalizations was 1.4 years (inter-quartile range 0.5-3.7). Probands had a dose-dependent increase in risk if sibling/s had 1, 2, or 3+ infection-related hospitalizations (adjusted hazard ratio, aHR 1.41, 95% CI 1.39-1.43; aHR 1.65, 1.61-1.69; aHR 1.83, 1.77-1.90, respectively). Among siblings with the same clinical infection type, highest sibling risks were for genitourinary (aHR 2.06, 1.68-2.53), gastrointestinal (aHR 2.07, 1.94-2.19), and skin/soft tissue infections (aHR 2.34, 2.15-2.54). Overall risk of infection-related hospitalization was higher in children with more siblings and with older siblings.</p> <p><b>Conclusion:</b> In this population-based study, we observed an increased risk of infection-related hospitalization in children whose siblings were previously hospitalized for infection. Public health interventions may be particularly relevant in families of children hospitalized with infection.</p> |
| <b>Order of Authors:</b>                                                                                                      | Jessica E. Miller, Ph.D<br>Kim W. Carter<br>Nicholas de Klerk<br>David P. Burgner                                                                                                                                                                                                                                                                                                                                                                                                                                                                                                                                                                                                                                                                                                                                                                                                                                                                                                                                                                                                                                                                                                                                                                                                                                                                                                                                                                                                                                                                                                                                                                                                                                                                                                                                                                                                                                                                                                                                                                                                                                                                                                                                                                                                                                                 |
| <b>Additional Information:</b>                                                                                                |                                                                                                                                                                                                                                                                                                                                                                                                                                                                                                                                                                                                                                                                                                                                                                                                                                                                                                                                                                                                                                                                                                                                                                                                                                                                                                                                                                                                                                                                                                                                                                                                                                                                                                                                                                                                                                                                                                                                                                                                                                                                                                                                                                                                                                                                                                                                   |
| <b>Question</b>                                                                                                               | <b>Response</b>                                                                                                                                                                                                                                                                                                                                                                                                                                                                                                                                                                                                                                                                                                                                                                                                                                                                                                                                                                                                                                                                                                                                                                                                                                                                                                                                                                                                                                                                                                                                                                                                                                                                                                                                                                                                                                                                                                                                                                                                                                                                                                                                                                                                                                                                                                                   |
| <b>Financial Disclosure</b>                                                                                                   | This work is supported by the Australian National Health and Medical Research Council GTN572742, GTN106594, and GTN1064829 and GTN1175744 to DPB.                                                                                                                                                                                                                                                                                                                                                                                                                                                                                                                                                                                                                                                                                                                                                                                                                                                                                                                                                                                                                                                                                                                                                                                                                                                                                                                                                                                                                                                                                                                                                                                                                                                                                                                                                                                                                                                                                                                                                                                                                                                                                                                                                                                 |
| Enter a financial disclosure statement that describes the sources of funding for the work included in this submission. Review | Research at Murdoch Children's Research Institute is supported by by the Victorian Government's Operational Infrastructure Support Program.<br>The funders had no role in study design, data collection and analysis, decision to                                                                                                                                                                                                                                                                                                                                                                                                                                                                                                                                                                                                                                                                                                                                                                                                                                                                                                                                                                                                                                                                                                                                                                                                                                                                                                                                                                                                                                                                                                                                                                                                                                                                                                                                                                                                                                                                                                                                                                                                                                                                                                 |

the [submission guidelines](#) for detailed requirements. View published research articles from [PLOS ONE](#) for specific examples.

This statement is required for submission and **will appear in the published article** if the submission is accepted. Please make sure it is accurate.

#### Unfunded studies

Enter: *The author(s) received no specific funding for this work.*

#### Funded studies

Enter a statement with the following details:

- Initials of the authors who received each award
- Grant numbers awarded to each author
- The full name of each funder
- URL of each funder website
- Did the sponsors or funders play any role in the study design, data collection and analysis, decision to publish, or preparation of the manuscript?
- **NO** - Include this sentence at the end of your statement: *The funders had no role in study design, data collection and analysis, decision to publish, or preparation of the manuscript.*
- **YES** - Specify the role(s) played.

\* typeset

publish, or preparation of the manuscript.

#### Competing Interests

Use the instructions below to enter a competing interest statement for this submission. On behalf of all authors, disclose any [competing interests](#) that could be perceived to bias this work—acknowledging all financial support and any other relevant financial or non-financial competing interests.

This statement **will appear in the published article** if the submission is accepted. Please make sure it is accurate. View published research articles from [PLOS ONE](#) for specific examples.

The authors have declared that no competing interests exist.

**NO authors have competing interests**

Enter: *The authors have declared that no competing interests exist.*

**Authors with competing interests**

Enter competing interest details beginning with this statement:

*I have read the journal's policy and the authors of this manuscript have the following competing interests: [insert competing interests here]*

\* typeset

**Ethics Statement**

Enter an ethics statement for this submission. This statement is required if the study involved:

- Human participants
- Human specimens or tissue
- Vertebrate animals or cephalopods
- Vertebrate embryos or tissues
- Field research

Write "N/A" if the submission does not require an ethics statement.

General guidance is provided below. Consult the [submission guidelines](#) for detailed instructions. **Make sure that all information entered here is included in the Methods section of the manuscript.**

The study was approved by the Department of Health Human Research Ethics Committee (HREC), Murdoch Children's Research HREC and University of WA HREC.

**Format for specific study types**

**Human Subject Research (involving human participants and/or tissue)**

- Give the name of the institutional review board or ethics committee that approved the study
- Include the approval number and/or a statement indicating approval of this research
- Indicate the form of consent obtained (written/oral) or the reason that consent was not obtained (e.g. the data were analyzed anonymously)

**Animal Research (involving vertebrate animals, embryos or tissues)**

- Provide the name of the Institutional Animal Care and Use Committee (IACUC) or other relevant ethics board that reviewed the study protocol, and indicate whether they approved this research or granted a formal waiver of ethical approval
- Include an approval number if one was obtained
- If the study involved *non-human primates*, add *additional details* about animal welfare and steps taken to ameliorate suffering
- If anesthesia, euthanasia, or any kind of animal sacrifice is part of the study, include briefly which substances and/or methods were applied

**Field Research**

Include the following details if this study involves the collection of plant, animal, or other materials from a natural setting:

- Field permit number
- Name of the institution or relevant body that granted permission

**Data Availability**

Authors are required to make all data underlying the findings described fully available, without restriction, and from the time of publication. PLOS allows rare exceptions to address legal and ethical concerns. See the [PLOS Data Policy](#) and [FAQ](#) for detailed information.

No - some restrictions will apply

A Data Availability Statement describing where the data can be found is required at submission. Your answers to this question constitute the Data Availability Statement and **will be published in the article**, if accepted.

**Important:** Stating 'data available on request from the author' is not sufficient. If your data are only available upon request, select 'No' for the first question and explain your exceptional situation in the text box.

Do the authors confirm that all data underlying the findings described in their manuscript are fully available without restriction?

**Describe where the data may be found in full sentences. If you are copying our sample text, replace any instances of XXX with the appropriate details.**

- If the data are **held or will be held in a public repository**, include URLs, accession numbers or DOIs. If this information will only be available after acceptance, indicate this by ticking the box below. For example: *All XXX files are available from the XXX database (accession number(s) XXX, XXX).*
- If the data are all contained **within the manuscript and/or Supporting Information files**, enter the following: *All relevant data are within the manuscript and its Supporting Information files.*
- If neither of these applies but you are able to provide **details of access elsewhere**, with or without limitations, please do so. For example:

*Data cannot be shared publicly because of [XXX]. Data are available from the XXX Institutional Data Access / Ethics Committee (contact via XXX) for researchers who meet the criteria for access to confidential data.*

*The data underlying the results presented in the study are available from (include the name of the third party*

Please visit the Data Linkage Western Australia website: <https://www.datalinkage-wa.org.au/> for information regarding access to similar data used in this project.

*and contact information or URL).*

- This text is appropriate if the data are owned by a third party and authors do not have permission to share the data.

\* typeset

Additional data availability information:

1 **The familial risk of infection-related hospitalization: a population-based sibling study**

2

3 **(Short title: Sibling risk of infection-related hospitalization)**

4

5 Jessica E. Miller<sup>1,2\*</sup>, Kim W. Carter<sup>3</sup>, Nicholas de Klerk<sup>3</sup>, David P. Burgner<sup>1,2,4</sup>

6

7 **Affiliations:**

8 <sup>1</sup> Murdoch Children's Research Institute, Royal Children's Hospital, Parkville, Victoria,

9 Australia

10 <sup>2</sup> Department of Paediatrics, University of Melbourne, Parkville, Victoria, Australia

11 <sup>3</sup> Telethon Kids Institute, University of Western Australia, Perth, Western Australia, Australia

12 <sup>4</sup> Department of Paediatrics, Monash University, Clayton, Victoria, Australia

13

14 \* Corresponding author

15 Email: [jessica.miller@mcri.edu.au](mailto:jessica.miller@mcri.edu.au) (JEM)

16

17

18

## Abstract

**Objective:** To assess the risk of severe childhood infections within families, we conducted a sibling analysis in a population-based cohort study with genealogical linkage. We investigated the sibling risk of hospitalization with common infections, a marker of severity. We hypothesized that having siblings hospitalized for infection would increase the proband's subsequent risk of admission with infection.

**Study design:** We used population data on Western Australian live-born singletons and their siblings between 1980 and 2014. Measures of infection were infection-related hospitalizations from discharge diagnostic codes. Exposure was having a sibling who had an infection-related hospitalization. Outcomes were infection-related hospitalizations in the child/proband. Probands were followed until an infection-related hospitalization admission (up to the first three), death, 18th birthday, or end of 2014, whichever occurred first. Infection risks were estimated by adjusted Cox proportional hazard models for multiple events.

**Results:** Of 512,279 probands, 142,915 (27.9%) had infection-related hospitalizations; 133,322 (26.0%) had a sibling with a previous infection-related hospitalization (i.e. exposed). Median interval between sibling and proband infection-related hospitalizations was 1.4 years (interquartile range 0.5-3.7). Probands had a dose-dependent increase in risk if sibling/s had 1, 2, or 3+ infection-related hospitalizations (adjusted hazard ratio, aHR 1.41, 95% CI 1.39-1.43; aHR 1.65, 1.61-1.69; aHR 1.83, 1.77-1.90, respectively). Among siblings with the same clinical infection type, highest sibling risks were for genitourinary (aHR 2.06, 1.68-2.53), gastrointestinal (aHR 2.07, 1.94-2.19), and skin/soft tissue infections (aHR 2.34, 2.15-2.54). Overall risk of infection-related hospitalization was higher in children with more siblings and with older siblings.

**Conclusion:** In this population-based study, we observed an increased risk of infection-related hospitalization in children whose siblings were previously hospitalized for infection. Public health interventions may be particularly relevant in families of children hospitalized with infection.

**Abbreviations:** Western Australia (WA); Socio-economic status (SES); Hazard ratio (HR); Confidence interval (CI); Interquartile range (IQR)



## 54 **Introduction**

55 Infection is a predominant cause of childhood morbidity, mortality and health service utilization.

56 US national estimates from 2000-2012 indicate that infections in children aged <19 years

57 accounted for 24.5% of all hospitalizations.[1] In 2003, 43% of US children aged <1 year

58 admitted to hospital had an infection-related diagnosis, incurring a total cost of \$690 million.[2]

59 Microbial factors, such as outbreaks and heightened pathogen virulence, partly explain the

60 marked variation in infection severity following exposure to similar pathogens.[3] Sibling

61 analyses can account for shared heritable and environmental factors and measure associations

62 from exposures at different ages in siblings.[4] Sibling analyses provide robust estimates of

63 shared heritable determinants of infection that do not reflect seasonal variation in pathogen

64 epidemiology and virulence. In genetic epidemiology, sibling risk ratio, or relative recurrence

65 risk, is the ratio of risk in a sibling to a general population risk. Few studies have estimated the

66 sibling risk ratio of infectious diseases.[5]

67 We utilized total population data from Western Australia (WA) to estimate the risk of

68 hospitalizations for childhood infections within families. We hypothesized that having siblings

69 hospitalized for infection would increase the proband's subsequent risk of admission with

70 infection. We explored whether susceptibility varied by specific types of infections, the age and

71 number of siblings, and the interval between sibling and proband infection-related

72 hospitalizations.

73

74

## 75 **Methods**

### 76 **Study population**

77 Since 2011, WA has had an average growth rate of 1.81% and currently, has a population of ~2.6  
78 million people.[6] We conducted a population-based cohort study of live-born children in WA  
79 between January 1<sup>st</sup> 1980 and December 31<sup>st</sup> 2014, identified from the WA Birth Registry. Data  
80 from the WA Midwives' Notification System, Birth Register, Death Register, and Hospital  
81 Morbidity Database System were linked by probabilistic matching at the Data Linkage Branch of  
82 the WA Department of Health. Siblings were identified and their data linked with the Family  
83 Connections System, which creates links for pedigree relationships based on birth, death and  
84 marriage registrations.[7] Single child families and families with twins or higher multiples were  
85 excluded from the study; multiples may share virulent pathogens causing more severe  
86 contemporaneous infection and genetically identical multiples might inflate heritability estimates  
87 derived from siblings alone.[8] Half-siblings were not included as it was unknown when they  
88 became siblings or whether they resided in the same household. Individuals of Aboriginal or  
89 Torres Strait Islander descent were not included, as causal pathways are likely to be qualitatively  
90 different and include substantial economic disadvantage.[9]

91 The study was approved by the Department of Health Human Research Ethics Committee  
92 (HREC), Murdoch Children's Research HREC and University of WA HREC.

### 93 **Infection-related hospitalization (exposure and outcome)**

94 Data on infection-related hospitalizations were obtained from the Hospital Morbidity Database  
95 System, which has complete coverage of private and public WA hospital admissions.[10]

96 Discharge diagnostic codes are based on the International Classification of Diseases (ICD)  
97 versions 9 and 10-AM and have been repeatedly validated.[10]

98 Infection-related hospitalization is a robust and widely accepted measure of infection severity  
99 and reflects hospital admissions due to infections of sufficient severity to warrant inpatient  
100 care.[9,11] Infection-related hospitalizations were identified using principal and up to twenty  
101 additional ICD codes, a more sensitive measure of total infection burden than the principal code  
102 alone that has been used by other researchers for similar purposes.[9,12] An infection-related  
103 hospitalization was defined as admission with  $\geq 1$  infection discharge code occurring  $\geq 24$  hours  
104 after discharge for the birth-related hospitalization. We restricted infection-related  
105 hospitalizations to readmission following the birth-related discharge to avoid bias from suspected  
106 neonatal sepsis that is often either unconfirmed or caused by direct microbial exposure during  
107 birth. Overlapping or nested hospital transfers, where  $< 24$  hours had elapsed between discharge  
108 and re-hospitalization, and repeat infection-related hospitalizations within 7 days were  
109 considered as single admissions.

110 ICD infection codes were categorized *a priori* into seven broad clinical groups: invasive  
111 bacterial, gastrointestinal, lower respiratory tract, upper respiratory tract, skin and soft tissue,  
112 genitourinary, and viral infections, as previously described.[13] Additionally, we assessed  
113 specific common infections: tonsillitis (acute and chronic), otitis media (chronic), gastroenteritis  
114 and bronchiolitis; acute otitis media was uncommon and not included.

115 Exposure was defined as infection-related hospitalizations occurring in a sibling ('sibling  
116 infection-related hospitalization'), categorized as (0, 1, 2, 3+). The child of analysis, termed  
117 'proband' hereafter, became 'exposed' once a sibling had an infection-related hospitalization  
118 during the follow-up period. Exposure was considered time-varying; once a proband became

119 exposed, they were exposed for the remainder of the follow-up period. Probands were  
120 ‘unexposed’ for the period preceding the first sibling infection-related hospitalization or if no  
121 sibling infection-related hospitalizations occurred during follow-up. The study outcome was  
122 infection-related hospitalizations, up to the first 3 admissions, occurring in the proband during  
123 the follow-up period. 

## 124 **Covariates**

125 Data on maternal age, smoking during pregnancy, parity, birth weight, gestational age, sex,  
126 Apgar score, and birth mode were obtained from the Midwives’ Notification System, which  
127 collates details on all births in WA from 1980 onwards. Percentiles for area-level socioeconomic  
128 status (SES) were defined by matching address at birth to average socioeconomic census data for  
129 the same census Collector’s District from the census year closest to the birth year.[14] Data on  
130 smoking during pregnancy were available from 1997 onwards. 

## 131 **Statistical methods**

132 We estimated sibling risk ratios as the risk of infection-related hospitalizations in exposed  
133 probands (i.e. those whose sibling/s had an infection-related hospitalization) compared to the risk  
134 in unexposed probands (i.e. those whose sibling/s had not had infection-related hospitalization/s).  
135 For all children, follow-up time began when they became a sibling: for children with older  
136 siblings, follow-up time began at the child’s birth-related hospital discharge date; for children  
137 with only younger siblings, follow-up time began at the date of birth of their first sibling. All  
138 children were followed until they had an infection-related hospitalization admission (up to the  
139 first three admissions), death, 18th birthday, or end of 2014, whichever occurred first.  
140 Multivariable analyses adjusted for maternal age (<20, 20-24, 25-29, 30-34, ≥35 years), parity

141 (previous births no/yes), gestational age (<28, 28-29, 30-31, 32-34, 35, 36, 37, 38, 39-40, 41,  $\geq$ 42  
142 weeks), birth weight (1000-1499, 1500-1999, 2000-2499, 2500-2999, 3000-3499, 3500-3999,  
143  $\geq$ 4000 grams), sex, season of birth (spring, summer, autumn, winter), 5-minute Apgar score (0-7,  
144 8-10), birth mode (vaginal/cesarean), and year (2 year blocks). Adjusted hazard ratios (HRs) and  
145 95% confidence intervals (CIs) were estimated using multivariate Cox proportional hazard  
146 regression models for recurrent events data (conditional risk set models) by Prentice et al.[15]  
147 Proband infection-related hospitalizations were the events and age in months was the underlying  
148 time variable. Time to each event was measured from entry time, and analyses were stratified by  
149 event order. Children in a family generally contributed to the analyses both as a proband and as a  
150 sibling, when their sibling was the proband. Depending on family size, children could occur in  
151 more than one proband/sibling unit. Robust standard errors accounted for dependence of family  
152 members.

153 Data on smoking during pregnancy (no/yes) were not included in overall analyses, as these data  
154 were unavailable for the entire study period. Given the missing values for smoking and SES,  
155 sensitivity analyses were conducted including and excluding these variables. All other covariates  
156 had few missing data; no imputations were warranted.

157 We estimated sibling risk ratios for overall, clinical group, and specific common infections. For  
158 clinical and specific infection sibling risk ratios, risks were estimated among probands and  
159 siblings who presented with the same clinical group or specific infection. We additionally  
160 estimated clinical group estimates if siblings presented with any infection. For specific  
161 infections, we conducted stratified analyses for siblings younger or older than the proband. For  
162 simplicity and to explore an age effect, we restricted these analyses to families where siblings  
163 were either all younger or all older than the proband.

164 We calculated overall infection-related hospitalization risk in children age <5 and 5-18 years by  
165 the time-at-risk for infection-related hospitalization following exposure. Time-at-risk was  
166 defined among the unexposed as the time from the start of follow-up to the first proband  
167 infection-related hospitalization or end of study, whichever occurred first, and among the  
168 exposed as the time from the first sibling infection-related hospitalization to the first proband  
169 infection-related hospitalization or end of study, whichever occurred first. Within time-at-risk  
170 intervals and exposure group, infection-related hospitalization risk was calculated as number of  
171 cases divided by total number unexposed or exposed, respectively.

172 We estimated sibling risk ratios by family size (1, 2, 3+ siblings) and by age of siblings  
173 (younger/older than proband), accounting for the number and distribution of the sibling  
174 infection-related hospitalizations. Analyses by age of sibling were restricted to families where all  
175 siblings were either younger or older than the proband. To assess the possible contribution of  
176 pathogen sharing, we calculated the time between admission in the sibling and first admission in  
177 the proband with the same clinical infection type. To minimize risk due to pathogen sharing  
178 among siblings, we also performed analyses excluding those whose proband infection-related  
179 hospitalization admissions occurred within 30 days of the sibling exposure.

180 We performed a sensitivity analysis using infection-related hospitalizations identified by the  
181 principal and first 3 additional ICD codes. To address potential unmeasured confounding, we  
182 calculated an E-value, which estimates the minimum strength of association that an unmeasured  
183 confounder would need to have with both the exposure and outcome in order to fully explain  
184 away the observed association.[16] Lastly, we calculated population attributable fractions for all  
185 infections and for bronchiolitis. Analyses were performed in STATA 13.0.[17]

186

187 **Results**

188 Of the 512,279 probands, 142,915 (27.9%) had at least one infection-related hospitalization and  
 189 49,582 (9.7%) had multiple infection-related hospitalization, with a total of 212,882 proband  
 190 infection-related hospitalizations during follow-up. By the end of follow-up, 133,322 probands  
 191 (26.0%) were exposed, i.e. had a sibling with an infection-related hospitalization. On average,  
 192 exposed probands were first-born children with younger mothers (Table 1). The median age of  
 193 when probands were exposed was 4.7 years (interquartile range, IQR 2.7-7.7) among those who  
 194 did not have an infection-related hospitalization during follow-up, and 4.2 (IQR 2.2-7.1) among  
 195 those who did. The median age in probands for their first infection-related hospitalization was  
 196 3.2 years (IQR 1.2-6.0); among exposed 5.5 years (IQR 3.0-9.1) and among unexposed 2.8 (IQR  
 197 1.1-5.4). The median time between a sibling and proband infection-related hospitalization was  
 198 1.4 years (IQR 0.5-3.7).

199

200 **Table 1 – Characteristics of proband children in study population, time-varying exposure status at**  
 201 **end of follow-up period**

| Characteristic               | Infection-related hospitalization in sibling(s) (Exposure) |      |               |      |       |       | Chi-squared<br>p-value* |
|------------------------------|------------------------------------------------------------|------|---------------|------|-------|-------|-------------------------|
|                              | No (Unexposed)                                             |      | Yes (Exposed) |      | Total |       |                         |
|                              | N                                                          | %    | N             | %    | N     | %     |                         |
| <b>Maternal age at birth</b> |                                                            |      |               |      |       |       |                         |
| <20                          | 10,619                                                     | 2.8  | 6,151         | 4.6  | 16770 | 3.27  | 0.000                   |
| 20-24                        | 66,727                                                     | 17.6 | 31,177        | 23.4 | 97904 | 19.11 |                         |

|         |         |      |        |      |        |       |
|---------|---------|------|--------|------|--------|-------|
| 25-29   | 131,256 | 34.6 | 49,307 | 37.0 | 180563 | 35.25 |
| 30-34   | 117,912 | 31.1 | 34,798 | 26.1 | 152710 | 29.81 |
| ≥35     | 52,440  | 13.8 | 11,888 | 8.9  | 64328  | 12.56 |
| Missing | 3       | 0.0  | 1      | 0.0  | 4      | 0.0   |

**Maternal parity (had previous birth(s))**

|         |         |      |        |      |         |      |       |
|---------|---------|------|--------|------|---------|------|-------|
| No      | 141,861 | 37.4 | 61,083 | 45.8 | 202,944 | 39.6 | 0.000 |
| Yes     | 237,096 | 62.6 | 72,239 | 54.2 | 309,335 | 60.4 |       |
| Missing | 0       | 0.0  | 0      | 0.0  | 0       | 0.0  |       |

**Sex**

|         |         |      |        |      |         |      |       |
|---------|---------|------|--------|------|---------|------|-------|
| Male    | 197,026 | 52.0 | 66,469 | 49.9 | 263,495 | 51.4 | 0.000 |
| Female  | 181,927 | 48.0 | 66,853 | 50.1 | 248,780 | 48.6 |       |
| Missing | 4       | 0.0  | 0      | 0.0  | 4       | 0.0  |       |

**Season of birth**

|         |        |      |        |      |         |      |       |
|---------|--------|------|--------|------|---------|------|-------|
| Spring  | 94,813 | 25.0 | 33,223 | 24.9 | 128,036 | 25.0 | 0.707 |
| Summer  | 91,339 | 24.1 | 32,245 | 24.2 | 123,584 | 24.1 |       |
| Autumn  | 97,757 | 25.8 | 34,276 | 25.7 | 132,033 | 25.8 |       |
| Winter  | 95,048 | 25.1 | 33,578 | 25.2 | 128,626 | 25.1 |       |
| Missing | 0      | 0.0  | 0      | 0.0  | 0       | 0.0  |       |

**Apgar score 5 minutes**

|         |         |      |         |      |         |      |       |
|---------|---------|------|---------|------|---------|------|-------|
| 0-7     | 9,899   | 2.6  | 3,597   | 2.7  | 13,496  | 2.6  | 0.146 |
| 8-10    | 368,796 | 97.3 | 129,644 | 97.2 | 498,440 | 97.3 |       |
| Missing | 262     | 0.1  | 81      | 0.1  | 343     | 0.0  |       |

**Birth mode**

|          |         |      |         |      |         |      |       |
|----------|---------|------|---------|------|---------|------|-------|
| Vaginal  | 283,643 | 74.9 | 102,430 | 76.8 | 386,073 | 75.4 | 0.000 |
| Cesarean | 95,314  | 25.2 | 30,892  | 23.2 | 126,206 | 24.6 |       |



|                                |         |      |        |      |         |      |                                                                                       |
|--------------------------------|---------|------|--------|------|---------|------|---------------------------------------------------------------------------------------|
| Missing                        | 0       | 0.0  | 0      | 0.0  | 0       | 0.0  |                                                                                       |
| <b>Birth year</b>              |         |      |        |      |         |      |                                                                                       |
| 1980-84                        | 30,956  | 8.2  | 13,528 | 10.2 | 44,484  | 8.7  | 0.000                                                                                 |
| 1985-89                        | 51,432  | 13.6 | 22,209 | 16.7 | 73,641  | 14.4 |                                                                                       |
| 1990-94                        | 56,531  | 14.9 | 24,588 | 18.4 | 81,119  | 15.8 |                                                                                       |
| 1995-99                        | 57,653  | 15.2 | 24,155 | 18.1 | 81,808  | 16.0 |                                                                                       |
| 2000-04                        | 58,840  | 15.5 | 21,452 | 16.1 | 80,292  | 15.7 |                                                                                       |
| 2005-10                        | 87,209  | 23.0 | 22,934 | 17.2 | 110,143 | 21.5 |                                                                                       |
| 2011-13                        | 36,336  | 9.6  | 4,456  | 3.3  | 40,792  | 8.0  |                                                                                       |
| Missing                        | 0       | 0.0  | 0      | 0.0  | 0       | 0.0  |                                                                                       |
| <b>Gestational age (weeks)</b> |         |      |        |      |         |      |                                                                                       |
| <28                            | 533     | 0.1  | 135    | 0.1  | 668     | 0.1  | 0.000                                                                                 |
| 28-29                          | 592     | 0.2  | 187    | 0.1  | 779     | 0.2  |                                                                                       |
| 30-31                          | 969     | 0.3  | 319    | 0.2  | 1,288   | 0.3  |  |
| 32-34                          | 4,635   | 1.2  | 1,615  | 1.2  | 6,250   | 1.2  |                                                                                       |
| 35                             | 4,461   | 1.2  | 1,703  | 1.3  | 6,164   | 1.2  |                                                                                       |
| 36                             | 9,641   | 2.5  | 3,473  | 2.6  | 13,114  | 2.6  |                                                                                       |
| 37                             | 28,210  | 7.4  | 9,892  | 7.4  | 38,102  | 7.4  |                                                                                       |
| 38                             | 81,052  | 21.4 | 26,706 | 20.0 | 107,758 | 21.0 |                                                                                       |
| 39-40                          | 195,890 | 51.7 | 69,037 | 51.8 | 264,927 | 51.7 |                                                                                       |
| 41                             | 47,410  | 12.5 | 17,814 | 13.4 | 65,224  | 12.7 |                                                                                       |
| ≥42                            | 5,145   | 1.4  | 2,232  | 1.7  | 7,377   | 1.4  |                                                                                       |
| Missing                        | 419     | 0.1  | 209    | 0.2  | 628     | 0.1  |                                                                                       |
| <b>Birthweight (grams)</b>     |         |      |        |      |         |      |                                                                                       |
| <1000                          | 564     | 0.2  | 141    | 0.1  | 705     | 0.1  | 0.000                                                                                 |

|            |         |      |        |      |         |      |
|------------|---------|------|--------|------|---------|------|
| 1000-<1500 | 1,120   | 0.3  | 384    | 0.3  | 1,504   | 0.3  |
| 1500-<2000 | 2,342   | 0.6  | 814    | 0.6  | 3,156   | 0.6  |
| 2000-<2500 | 9,605   | 2.5  | 3,575  | 2.7  | 13,180  | 2.6  |
| 2500-<3000 | 53,240  | 14.1 | 19,384 | 14.5 | 72,624  | 14.2 |
| 3000-<3500 | 144,371 | 38.1 | 51,146 | 38.4 | 195,517 | 38.2 |
| 3500-<4000 | 123,930 | 32.7 | 43,106 | 32.3 | 167,036 | 32.6 |
| ≥4000      | 43,779  | 11.6 | 14,769 | 11.1 | 58,548  | 11.4 |
| Missing    | 6       | 0.0  | 3      | 0.0  | 9       | 0.0  |

**Maternal socioeconomic status (percentile)** 

|             |        |      |        |      |         |      |       |
|-------------|--------|------|--------|------|---------|------|-------|
| lowest <10  | 23,606 | 6.2  | 10,071 | 7.6  | 33,677  | 6.6  | 0.000 |
| 10-25       | 46,252 | 12.2 | 17,538 | 13.2 | 63,790  | 12.5 |       |
| 25-50       | 83,934 | 22.2 | 30,553 | 22.9 | 114,487 | 22.4 |       |
| 50-75       | 88,923 | 23.5 | 29,572 | 22.2 | 118,495 | 23.1 |       |
| 75-90       | 61,186 | 16.2 | 19,125 | 14.3 | 80,311  | 15.7 |       |
| highest >90 | 42,552 | 11.2 | 12,881 | 9.7  | 55,433  | 10.8 |       |
| Missing     | 32,504 | 8.6  | 13,582 | 10.2 | 46,086  | 9.0  |       |

**Maternal smoking during pregnancy**

|         |         |      |        |      |         |      |       |
|---------|---------|------|--------|------|---------|------|-------|
| No      | 184,327 | 48.6 | 51,065 | 38.3 | 235,392 | 46.0 | 0.000 |
| Yes     | 24,816  | 6.6  | 8,610  | 6.5  | 33,426  | 6.5  |       |
| Missing | 169,814 | 44.8 | 73,647 | 55.2 | 243,461 | 47.5 |       |

---

\*Chi-square test of independence for exposure status and dichotomous and categorized measures

202

203 We observed an increased risk of infection-related hospitalization among probands whose

204 sibling/s had infection-related hospitalization/s. The risk increased in a dose-dependent manner

205 with number of infection-related hospitalizations in the sibling/s (1, 2, 3+) (adjusted hazard ratio,  
 206 aHR 1.41, 95% CI 1.39-1.43; aHR 1.65, 1.61-1.69; aHR 1.83, 1.77-1.90, respectively) (Fig 2A).

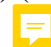

207 Among families where the proband and their sibling were hospitalized with the same clinical  
 208 infection type, the median time between sibling and proband hospitalizations ranged from 0.7  
 209 years (IQR 0.01-2.9) for gastrointestinal infections, to 2.9 (IQR 1.5-5.9) for invasive bacterial  
 210 infections. The highest risks were for genitourinary (aHR 2.06, 1.68-2.53), gastrointestinal (aHR  
 211 2.07, 1.94-2.19) and skin and soft tissue infections (aHR 2.34, 2.15-2.54). Risks were lower for  
 212 any infection than for the same clinical infection group (Table 2).

213

214 **Table 2 - Infection-related hospitalization sibling hazard ratios by clinical infection groups**

215 Infection-related hospitalization sibling hazard ratios by type of clinical infection in proband (outcome)  
 216 and sibling (exposure), compared to risk in probands whose sibling/s did not have infection-related  
 217 hospitalizations (reference group).

| Type of infection in proband | Type of infection in sibling | Number of infections in sibling | Adjusted HR (95% CI) |
|------------------------------|------------------------------|---------------------------------|----------------------|
| <b>Genitourinary</b>         |                              |                                 |                      |
|                              | Any infection                | Yes                             | 1.42 (1.33-1.51)     |
|                              | Genitourinary                | Yes                             | 2.06 (1.68-2.53)     |
|                              |                              | 1                               | 1.99 (1.61-2.45)     |
|                              |                              | 2+                              | 3.23 (1.61-6.46)     |
| <b>Invasive bacterial</b>    |                              |                                 |                      |
|                              | Any infection                | Yes                             | 1.3 (1.19-1.42)      |
|                              | Invasive bacterial           | Yes                             | 1.44 (0.87-2.38)     |

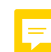

|                                |                         |     |                   |
|--------------------------------|-------------------------|-----|-------------------|
|                                |                         | 1   | 1.42 (0.85-2.38)  |
|                                |                         | 2+  | 2.21 (0.33-14.97) |
| <b>Lower respiratory tract</b> |                         |     |                   |
|                                | Any infection           | Yes | 1.41 (1.37-1.46)  |
|                                | Lower respiratory tract | Yes | 1.69 (1.61-1.77)  |
|                                |                         | 1   | 1.65 (1.57-1.73)  |
|                                |                         | 2+  | 2.12 (1.84-2.45)  |
| <b>Upper respiratory tract</b> |                         |     |                   |
|                                | Any infection           | Yes | 1.45 (1.43-1.47)  |
|                                | Upper respiratory tract | Yes | 1.64 (1.61-1.67)  |
|                                |                         | 1   | 1.61 (1.58-1.64)  |
|                                |                         | 2+  | 1.80 (1.74-1.87)  |
| <b>Viral</b>                   |                         |     |                   |
|                                | Any infection           | Yes | 1.40 (1.35-1.44)  |
|                                | Viral                   | Yes | 1.76 (1.64-1.88)  |
|                                |                         | 1   | 1.72 (1.60-1.85)  |
|                                |                         | 2+  | 2.37 (1.84-3.05)  |
| <b>Gastrointestinal</b>        |                         |     |                   |
|                                | Any infection           | Yes | 1.48 (1.43-1.54)  |
|                                | Gastrointestinal        | Yes | 2.07 (1.95-2.20)  |
|                                |                         | 1   | 2.04 (1.92-2.18)  |

2+ 2.43 (1.98-2.97)

**Skin and soft tissue**

|                      |     |                  |
|----------------------|-----|------------------|
| Any infection        | Yes | 1.46 (1.4-1.52)  |
| Skin and soft tissue | Yes | 2.34 (2.16-2.54) |
|                      | 1   | 2.33 (2.14-2.53) |
|                      | 2+  | 2.52 (1.89-3.36) |

218

219 Adjusted for maternal age (<20, 20-24, 25-29, 30-34, ≥35 years), parity (previous births no/yes), gestational age  
220 (<28, 28-29, 30-31, 32-34, 35, 36, 37, 38, 39-40, 41, ≥42 weeks), birth weight (1000-1499, 1500-1999, 2000-2499,  
221 2500-2999, 3000-3499, 3500-3999, ≥4000 grams), sex of the child, season of birth (spring, summer, autumn,  
222 winter), 5-minute Apgar score (0-7, 8-10), birth mode (vaginal/cesarean), birth year (2 year blocks).

223 Number of infections in sibling was analyzed as both dichotomous (Yes/No (reference)) or categorical (0  
224 (reference), 1, 2+).

225

226 For the specific infections, the median time between sibling and proband infection-related  
227 hospitalization ranged from 40 days for bronchiolitis to 2.4 years for chronic tonsillitis. The  
228 highest observed risk was for chronic tonsillitis among probands who had an older sibling  
229 previously hospitalized for chronic tonsillitis (aHR 3.08, 2.92-3.24) (S1 Fig). 

230 Overall risks of infection were highest among preschool children (age <5 years) (Fig 3). For all  
231 children, the highest risk for an infection-related hospitalization occurred among children whose  
232 sibling was hospitalized with an infection within the previous month (0.93 in exposed children  
233 <5 years, 0.63 in exposed children 5-18 years). In children <5 years, the risk difference between  
234 exposed and unexposed children remained fairly constant regardless of when, in the 12 months

235 prior to a proband infection-related hospitalization, the exposure occurred. In children aged 5-18  
236 years, the risk difference between exposed and unexposed was similar regardless of whether  
237 exposure occurred one month to 2 years prior to a proband infection-related hospitalization.

238 The dose-response effect with increasing number of sibling infection-related hospitalizations  
239 persisted despite family size. However, with increasing family size, overall infection-related  
240 hospitalization risks slightly decreased. Overall risk of infection was slightly higher in children  
241 with older siblings (Fig 4A). Increased infection-related hospitalization risk among exposed  
242 probands persisted even when proband infection-related hospitalization occurring within 30 days  
243 of a sibling infection-related hospitalization were excluded (Fig 4B). In families with 2+ siblings,  
244 we did not observe any pattern of association with sibling infections occurring in one or multiple  
245 siblings (Fig 4C).

246 Sensitivity analyses including only infections coded as the principal or first three additional  
247 diagnostic codes showed similar results (S1 Table). Based on the E-value, an unmeasured  
248 confounder would need an association of  $\geq 1.85$  with infection-related hospitalization in both the  
249 sibling and proband, to explain away the observed associations, but weaker confounding could  
250 not.

251 We calculated that 12.2% (11.8-12.6) (n=29027) of infection-related hospitalizations in the  
252 population would be potentially prevented if siblings did not have prior infection-related  
253 hospitalizations. If multiple infection-related hospitalizations in siblings were reduced, 4.4%  
254 (4.2-4.6) (n=10,469) of infection-related hospitalizations in probands could be prevented. 1.3%  
255 (0.5-2.1) (n=200) of infection-related hospitalizations for bronchiolitis would be prevented if  
256 siblings did not have bronchiolitis.

257

## 258 **Discussion**

259 The risk of hospitalization with infection was increased among children whose siblings had  
260 previous infection-related hospitalizations, compared with children whose siblings had no  
261 previous infection-related hospitalizations. The risk increased in a dose-response manner from  
262 40% in children with one sibling infection-related hospitalization to 80% with  $\geq 3$  sibling  
263 infection-related hospitalizations.

264 Increased risks were observed for all clinical and specific infection groups. The long median  
265 interval (1.4 years) between sibling and proband infection-related hospitalization suggests that  
266 factors other than sharing of virulent pathogens or seasonal outbreaks explain the increased  
267 risks.[8] Further, when sibling and proband had infection-related hospitalizations in the same  
268 clinical group, risks increased, suggesting shared underlying risks, such as more specific  
269 heritable and environmental factors.[3,18]

270 Sibling infection-related hospitalization risk was reduced in larger families, but the mechanisms  
271 are unclear. This may reflect differential use of child care, a well-recognized risk factor for  
272 childhood infection;[19] families with more older children use less child care. Almost 50% of  
273 Australian families with  $\leq 2$  children are likely to be enrolled in child care compared to 33% of  
274 larger families (3+ children),[20] however, data on child care attendance in our population were  
275 unavailable. In addition, larger sibship size is protective against asthma, allergy and some  
276 autoimmune diseases in children and adults.[21,22] Early microbial exposures associated with  
277 increased family size, such as increased microbiome diversity, may optimise early life immune

278 responses.[23] Overall risks were slightly lower in families with siblings younger than the  
279 proband, likely reflecting reduced susceptibility to more severe infection with increasing age.

280 The strengths of our study include 35 years of total population linked data with minimal loss to  
281 follow-up. The WA Data Linkage System is a powerful and unique resource of data from a  
282 stable population.[24] All WA hospital admission data are captured and almost all maternal full  
283 siblings have been identified. The Midwives' Notification Form records >99% of all live  
284 births.[25] Few other studies have examined sibling risks of infectious diseases apart from those  
285 reporting on single infectious diseases.[5]

286 Our outcome measure of infection-related hospitalization is a marker of infectious disease  
287 severity. Hospitalization is less influenced by health-seeking behavior, social disadvantage and  
288 physician management than emergency department or primary care presentations and by  
289 practitioner-related variation in management [26,27]; further studies using these less severe  
290 outcomes of infection are of interest, however these data were unavailable for this study.

291 Inclusion of principal and additional diagnostic codes, an approach used in analogous  
292 studies,[12] captures infection burden more completely than the principal code alone. Sensitivity  
293 analyses that captured infections based on the principal and first three additional codes showed  
294 similar results as when all 20 additional codes were considered.

295 Sibling studies are more powerful than twin studies for less common but clinically important  
296 infections.[3] Infections in sibling pairs (unlike twins) generally occur many months apart, much  
297 longer than the incubation period for almost all childhood pathogens. This reduces possible  
298 biases from over-diagnosis in the second child, from clinically unwarranted hospitalization with  
299 the same infection in the second child (e.g. social factors or parental anxiety), and from the  
300 confounding effects of shared virulent pathogens. Although many infections show increased



301 concordance rates in monozygous versus dizygous twins,[18,28] twin infection studies may  
302 overestimate genetic factors and underestimate shared environmental exposures. For example,  
303 twin data on tuberculosis, where increased concordance in monozygous twins has long been  
304 suggestive of host genetic susceptibility, have been re-analyzed and the findings are suggested to  
305 be largely due to environmental factors which may outweigh the importance of hereditary  
306 factors.[29]

307 Population analyses have some unavoidable limitations. Data are limited to routinely collected  
308 and recorded information. Data on infections managed in primary care or in emergency  
309 departments and data on potential unmeasured co-variates, (e.g. child care attendance,  
310 breastfeeding, tobacco smoke exposure, obesity, parental chronic disease, and environmental  
311 exposures) were unavailable. Smoking data were available from 1997 onwards; SES data were  
312 missing for 9% of the population. We therefore present our main findings with and without  
313 adjustments for smoking and SES. We could not assess migration from WA or transfer to  
314 facilities outside the state; both are rare.[30] Family Connections uses registrations where parents  
315 may not be biological (e.g. adoptions, surrogacy), but these families could not be identified. The  
316 estimated small percentage of adoptions is unlikely to skew our results but should be considered  
317 when interpreting heritability.

318 Sibling risks reflect shared genomic susceptibility and environmental exposures. However, the  
319 long interval between sibling and proband admission suggests infection within families with  
320 virulent organisms is an unlikely explanation for increased risks, especially as most pediatric  
321 pathogens are widely distributed and carried asymptotically in the majority.[3] In a study of  
322 meningococcal disease, the sibling risk ratio was 30.3 overall and 8.2 if cases occurred >1 year  
323 apart,[8] indicating that a more accurate estimate of the contribution of shared heritable and

324 environmental factors, independent of pathogen sharing, is likely if the interval between cases is  
325 longer than incubation period and asymptomatic carriage of the invasive strain. In our study, we  
326 performed a sub-group analysis excluding cases within 30 days following the sibling's infection  
327 and the increased risk in the proband remained.

328

## 329 **Conclusions**

330 These data help establish the heritable association of hospitalization for common childhood  
331 infections among siblings. The findings highlight the importance of preventative measures and  
332 efforts to reduce environmental risk factors, especially in families of children hospitalized with  
333 infection.

334

## 335 **Acknowledgements**

336 The authors would like to thank the staff at the Western Australia Data Linkage Branch. We  
337 thank the data custodians of the Birth Registrations, Death Registrations, Hospital Morbidity  
338 Data Collection and Midwives Notification System.

339

## 340 **Author contributions**

341 All authors contributed to the planning and design of the epidemiological study. JEM and NdK  
342 reviewed the raw data and were directly involved in the analysis. DPB, KWC, and NdK provided  
343 analytical feedback based on aggregated results. JEM and DPB drafted the manuscript, with  
344 input from all authors. All authors provided substantive review and commentary on multiple

345 drafts and approved the final version. JEM had full access to all of the data in the study and takes  
346 responsibility for the integrity of the data and the accuracy of the data analysis.

347

348

349

350

## 351 **References**

- 352
- 353 1. Goto T, Tsugawa Y, Mansbach JM, Camargo CA, Jr., Hasegawa K. Trends in Infectious  
354 Disease Hospitalizations in US Children, 2000 to 2012. *Pediatr Infect Dis J.* 2016;35(6):e158-63.  
355 Epub 2016/03/12. doi: 10.1097/INF.0000000000001134. PubMed PMID: 26967815; PubMed  
356 Central PMCID: PMC4912127.
- 357 2. Yorita KL, Holman RC, Sejvar JJ, Steiner CA, Schonberger LB. Infectious disease  
358 hospitalizations among infants in the United States. *Pediatrics.* 2008;121(2):244-52. Epub  
359 2008/02/05. doi: 10.1542/peds.2007-1392. PubMed PMID: 18245414.
- 360 10.1542/peds.2007-1392. PubMed PMID: 18245414.
- 361 3. Burgner D, Jamieson SE, Blackwell JM. Genetic susceptibility to infectious diseases: big  
362 is beautiful, but will bigger be even better? *Lancet Infect Dis.* 2006;6(10):653-63. doi:  
363 10.1016/S1473-3099(06)70601-6. PubMed PMID: 17008174; PubMed Central PMCID:  
364 PMCPMC2330096.
- 365 4. Song H, Fall K, Fang F, Erlendsdottir H, Lu D, Mataix-Cols D, et al. Stress related  
366 disorders and subsequent risk of life threatening infections: population based sibling controlled  
367 cohort study. *BMJ.* 2019;367:l5784. Epub 2019/10/28. doi: 10.1136/bmj.l5784. PubMed PMID:  
368 31645334; PubMed Central PMCID: PMC6812608
- 369 5. Rostgaard K, Nielsen TR, Wohlfahrt J, Ullum H, Pedersen O, Erikstrup C, et al. Sibship  
370 structure and risk of infectious mononucleosis: a population-based cohort study. *Int J Epidemiol.*  
371 2014;43(5):1607-14. Epub 2014/12/02. PubMed PMID: 25436250.
- 372 6. Australia P. Population of Western Australia 2020 [cited 2020 May 1]. Available from:  
373 <http://www.population.net.au/population-of-western-australia/>.
- 374 7. Glasson EJ, de Klerk NH, Bass AJ, Rosman DL, Palmer LJ, Holman CD. Cohort profile:  
375 The Western Australian Family Connections Genealogical Project. *Int J Epidemiol.*  
376 2008;37(1):30-5. Epub 2007/07/06. doi: 10.1093/ije/dym136. PubMed PMID: 17611241.
- 377 10.1093/ije/dym136. PubMed PMID: 17611241.
- 378 8. Haralambous E, Weiss HA, Radalowicz A, Hibberd ML, Booy R, Levin M. Sibling  
379 familial risk ratio of meningococcal disease in UK Caucasians. *Epidemiol Infect.*  
380 2003;130(3):413-8. PubMed PMID: 12825725.
- 381 9. Carville KS, Lehmann D, Hall G, Moore H, Richmond P, de Klerk N, et al. Infection is  
382 the major component of the disease burden in aboriginal and non-aboriginal Australian children:  
383 a population-based study. *Pediatr Infect Dis J.* 2007;26(3):210-6. PubMed PMID: 17484216.
- 384 10. Holman CD, Bass AJ, Rosman DL, Smith MB, Semmens JB, Glasson EJ, et al. A decade  
385 of data linkage in Western Australia: strategic design, applications and benefits of the WA data  
386 linkage system. *Aust Health Rev.* 2008;32(4):766-77. Epub 2008/11/05. doi: 10.1136/bmj.j3862. PubMed PMID: 18980573.
- 387 PubMed PMID: 18980573.
- 388 11. Petersen L, Andersen PK, Sorensen TI. Genetic influences on incidence and case-fatality  
389 of infectious disease. *PLoS One.* 2010;5(5):e10603. doi: 10.1371/journal.pone.0010603. PubMed  
390 PMID: 20498716; PubMed Central PMCID: PMC2871036.
- 391 12. Tielemans S, de Melker HE, Hahne SJM, Boef AGC, van der Klis FRM, Sanders EAM,  
392 et al. Non-specific effects of measles, mumps, and rubella (MMR) vaccination in high income  
393 setting: population based cohort study in the Netherlands. *BMJ.* 2017;358:j3862. doi:  
394 10.1136/bmj.j3862. PubMed PMID: 28855159.

- 395 13. Miller JE, Hammond GC, Strunk T, Moore HC, Leonard H, Carter KW, et al.  
396 Association of gestational age and growth measures at birth with infection-related admissions to  
397 hospital throughout childhood: a population-based, data-linkage study from Western Australia.  
398 *Lancet Infect Dis*. 2016. doi: 10.1016/S1473-3099(16)00150-X. PubMed PMID: 27052469.
- 399 14. Pink B. An Introduction to Socio-Economic Indexes for Areas (SEIFA). In: Statistics.  
400 ABo, editor. Canberra: Australian Bureau of Statistics.; 2006.
- 401 15. Prentice RL, Williams BJ, Peterson AV. On the regression analysis of multivariate failure  
402 time data. *Biometrika*. 1981;68(2):373-9. doi: 10.1093/biomet/68.2.373.
- 403 16. VanderWeele TJ, Ding P. Sensitivity Analysis in Observational Research: Introducing  
404 the E-Value. *Ann Intern Med*. 2017;167(4):268-74. doi: 10.7326/M16-2607. PubMed PMID:  
405 28693043.
- 406 17. StataCorp. STATA Statistical Software: Release 13. 13.0 ed. College Station, TX:2013.
- 407 18. Jepson A. Twin studies for the analysis of heritability of infectious diseases. *B I Pasteur*.  
408 1998;96(2):71-81. PubMed PMID: WOS:000078369700001.
- 409 19. Kamper-Jorgensen M, Wohlfahrt J, Simonsen J, Gronbaek M, Benn CS. Population-  
410 based study of the impact of childcare attendance on hospitalizations for acute respiratory  
411 infections. *Pediatrics*. 2006;118(4):1439-46. doi: 10.1542/peds.2006-0373. PubMed PMID:  
412 17015534.
- 413 20. Statistics ABo. Childhood Education and Care (cat. no. 4402.0). Australia: 2008 June  
414 2008. Report No.
- 415 21. von Mutius E. The environmental predictors of allergic disease. *J Allergy Clin Immunol*.  
416 2000;105(1 Pt 1):9-19. Epub 2000/01/12. PubMed PMID: 10629447.
- 417 22. Hughes AM, Lucas RM, McMichael AJ, Dwyer T, Pender MP, van der Mei I, et al.  
418 Early-life hygiene-related factors affect risk of central nervous system demyelination and asthma  
419 differentially. *Clin Exp Immunol*. 2013;172(3):466-74. Epub 2013/04/23. doi:  
420 10.1111/cei.12077. PubMed PMID: 23600835; PubMed Central PMCID: PMC3646446.
- 421 23. Laursen MF, Zachariassen G, Bahl MI, Bergstrom A, Host A, Michaelsen KF, et al.  
422 Having older siblings is associated with gut microbiota development during early childhood.  
423 *BMC Microbiol*. 2015;15:154. doi: 10.1186/s12866-015-0477-6. PubMed PMID: 26231752;  
424 PubMed Central PMCID: PMC4522135.
- 425 24. Stanley FJ, Croft ML, Gibbins J, Read AW. A population database for maternal and child  
426 health research in Western Australia using record linkage. *Paediatr Perinat Epidemiol*.  
427 1994;8(4):433-47. PubMed PMID: 7870627.
- 428 25. Gee V HQ, Ernstzen AN. . Perinatal Statistics in Western Australia, 2005: Twenty third  
429 Annual Report of the Western Australian Midwives' Notification System. Department of Health,  
430 Western Australia, 2007.
- 431 26. Saxena S, Majeed A, Jones M. Socioeconomic differences in childhood consultation rates  
432 in general practice in England and Wales: prospective cohort study. *BMJ*. 1999;318(7184):642-  
433 6. PubMed PMID: 10066207; PubMed Central PMCID: PMC3646446.
- 434 27. Watson RL, Dowell SF, Jayaraman M, Keyserling H, Kolczak M, Schwartz B.  
435 Antimicrobial use for pediatric upper respiratory infections: reported practice, actual practice,  
436 and parent beliefs. *Pediatrics*. 1999;104(6):1251-7. PubMed PMID: 10585974.
- 437 28. Casselbrant ML, Mandel EM, Fall PA, Rockette HE, Kurs-Lasky M, Bluestone CD, et al.  
438 The heritability of otitis media: a twin and triplet study. *JAMA*. 1999;282(22):2125-30.
- 439 29. van der Eijk EA, van de Vosse E, Vandenbroucke JP, van Dissel JT. Heredity versus  
440 environment in tuberculosis in twins: the 1950s United Kingdom Prophit Survey Simonds and

441 Comstock revisited. *Am J Respir Crit Care Med.* 2007;176(12):1281-8. Epub 2007/09/08. doi:  
442 200703-435OC [pii]

443 10.1164/rccm.200703-435OC. PubMed PMID: 17823356.

444 30. Statistics ABo. Migration, Australia 2013-14 2015 [6/11/2015]. Available from:  
445 <http://www.abs.gov.au/ausstats/abs@.nsf/mf/3412.0/>.

446

447

## 448 **Supporting information**

### 449 **S1 Fig. Infection-related hospitalization sibling risk ratios for specific infection groups**

451 Infection-related hospitalization sibling risk ratios among probands whose sibling/s had infection-related  
452 hospitalization/s for the same specific infection compared to risk in probands whose siblings/s did not  
453 have infection-related hospitalizations (reference group), among younger and older siblings  
454 Adjusted for number of previous infection-related hospitalizations in proband (0, 1, 2+), maternal age  
455 (<20, 20-24, 25-29, 30-34, ≥35 years), parity (previous births no/yes), gestational age (<28, 28-29, 30-31,  
456 32-34, 35, 36, 37, 38, 39-40, 41, ≥42 weeks), birth weight (1000-1499, 1500-1999, 2000-2499, 2500-  
457 2999, 3000-3499, 3500-3999, ≥4000 grams), sex of the child, season of birth (spring, summer, autumn,  
458 winter), 5-minute Apgar score (0-7, 8-10), birth mode (vaginal/cesarean), birth year (2 year blocks).

459 ICD 9 and 10 codes for bronchiolitis:466.1, J21; gastroenteritis:009, 535.4 535.7, A09; otitis media  
460 chronic:381.1, 381.2, 381.3, 381.4, 382.1, 382.2, 382.3, H65.2, H65.3, H65.4, H65.9, H66.1, H66.2,  
461 H66.3; tonsillitis acute:034.0, 463, J03; tonsillitis chronic:474, J35. Acute otitis media 381.0, 382.0,  
462 H65.0, H65.1, H66.0 was uncommon and not included.

### 463 **S1 Table. Sensitivity analysis of infection-related hospitalization identification**

### 464 **S2 Fig. Time from exposure (sibling infection-related hospitalization) to outcome (proband 465 infection-related hospitalization) for all and specific infection groups**

466

467

468

## 469 **Figure Legend**

470 **Fig 1 – Flowchart of study population**

471 **Fig 2A - Overall infection-related hospitalization risk among probands whose sibling/s had**

472 **infection-related hospitalizations compared to risk in probands whose siblings/s did not have**

473 **infection-related hospitalizations (reference group).** Adjusted for maternal age, parity, gestational age,

474 birth weight, sex, season of birth, 5-minute Apgar score, birth mode, and birth year. Additional

475 adjustments for SES (from Socio-Economic Index for Areas (SEIFA) data) and smoking during

476 pregnancy. Smoking data available from 1997-2013.

477 **Fig 2B - Infection-related hospitalization risks excluding proband infection-related hospitalization**

478 **admissions occurring within 30 days following a sibling infection-related hospitalization exposure.**

479 Adjusted for maternal age, parity, gestational age, birth weight, sex, season of birth, 5-minute Apgar

480 score, birth mode, and birth year. Additional adjustments for SES (from Socio-Economic Index for Areas

481 (SEIFA) data) and smoking during pregnancy. Smoking data available from 1997-2013.

482 **Fig 3 - Risk of 1<sup>st</sup> occurrence infection-related hospitalization in children <5 and 5-18 years old, by**

483 **time-at-risk.** In the exposed group, ‘time-at-risk’ is the time from the first sibling infection-related

484 hospitalization (occurring prior to the 1<sup>st</sup> proband infection-related hospitalization) to the 1<sup>st</sup> proband

485 infection-related hospitalization or end of study, whichever occurred first. In the unexposed group, ‘time-

486 at-risk’ begins with the start of follow-up. Follow-up times shorter than the ‘time-at-risk’ interval were

487 not included in the interval risk calculations. ‘Cases’ refers to probands with infection-related

488 hospitalizations; ‘Non cases’ refers to probands with no infection-related hospitalizations.

489 **Fig 4A - Infection-related hospitalization sibling risk ratios by family size and age of siblings.**

490 Adjusted for maternal age, parity, gestational age, birth weight, sex of the child, season of birth, 5-minute

491 Apgar score, birth mode, birth year.



492 **Fig 4B - Infection-related hospitalization sibling risk ratios excluding proband infection-related**  
493 **hospitalization admissions occurring within 30 days following a sibling infection-related**  
494 **hospitalization exposure.** Adjusted for maternal age, parity, gestational age, birth weight, sex of the  
495 child, season of birth, 5-minute Apgar score, birth mode, birth year.

496 **Fig 4C – Infection-related hospitalization sibling risk ratio by family size and distribution of**  
497 **infections among siblings.** Adjusted for maternal age, parity, gestational age, birth weight, sex of the  
498 child, season of birth, 5-minute Apgar score, birth mode, birth year. IRH = infection-related  
499 hospitalization.

500

**Fig 1 – Flowchart of study population**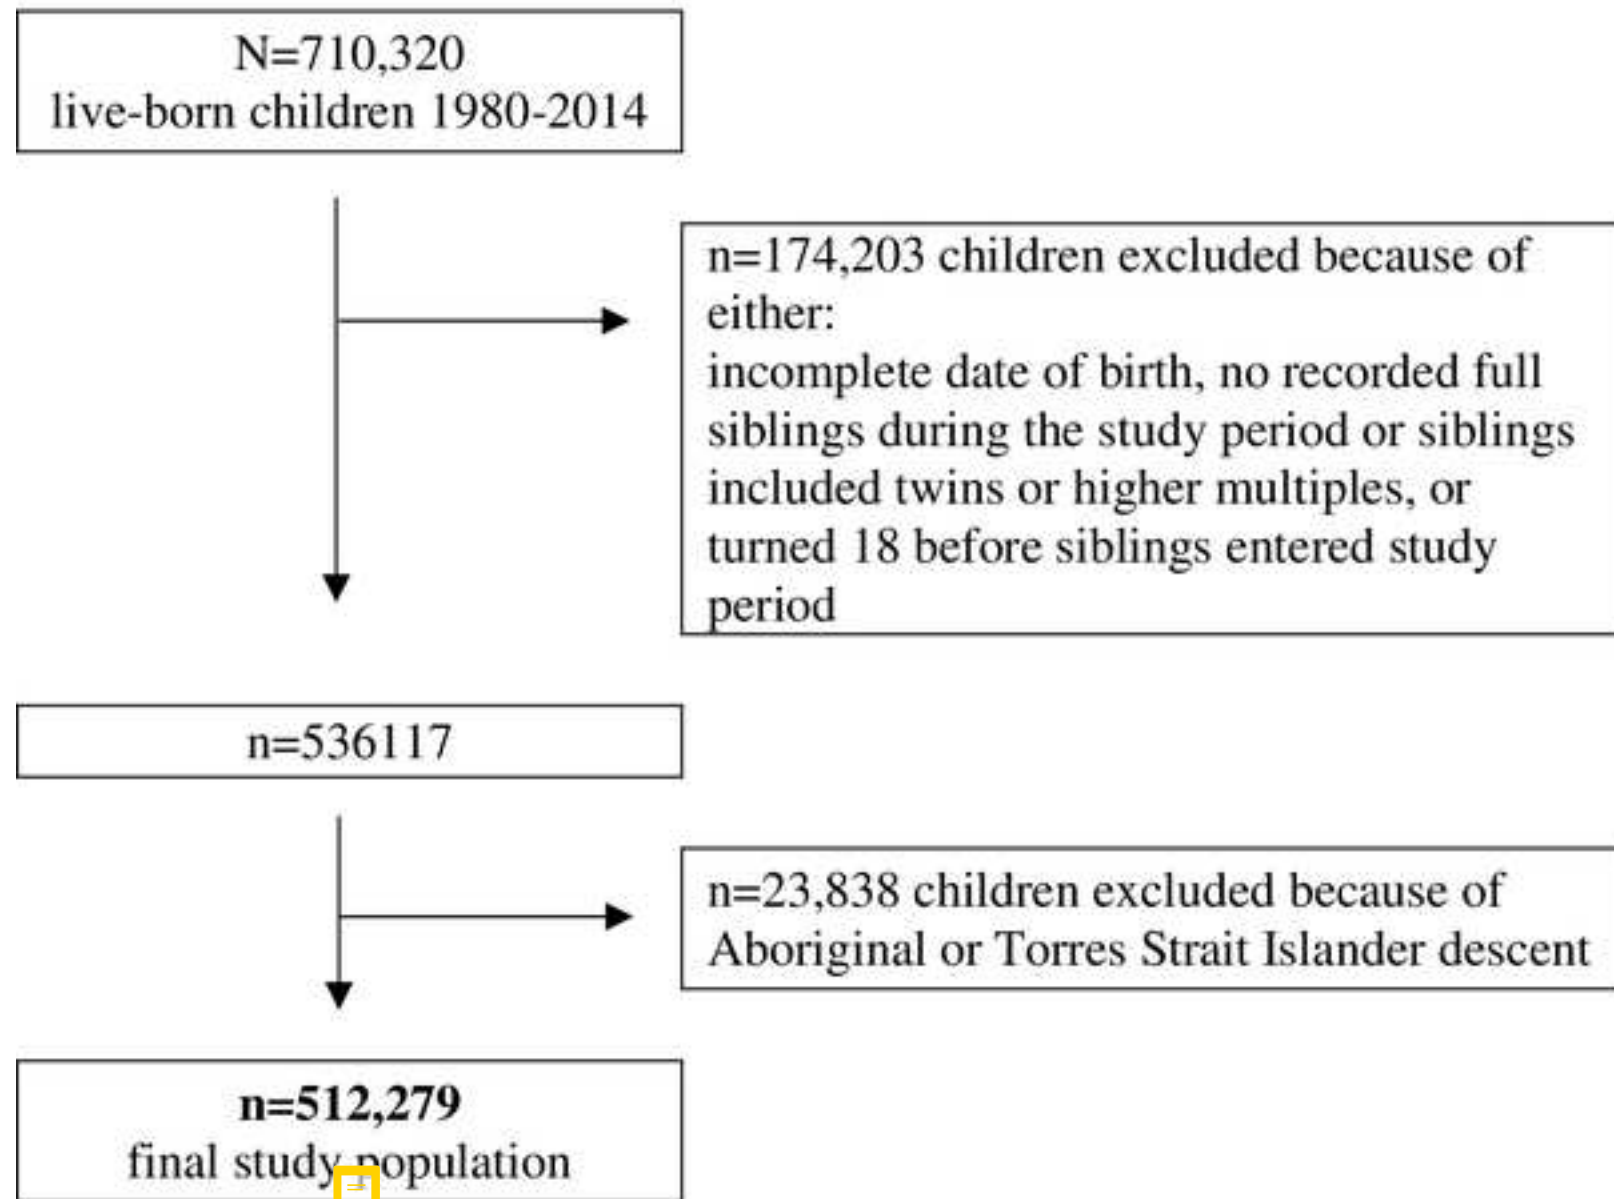

Figure 2A

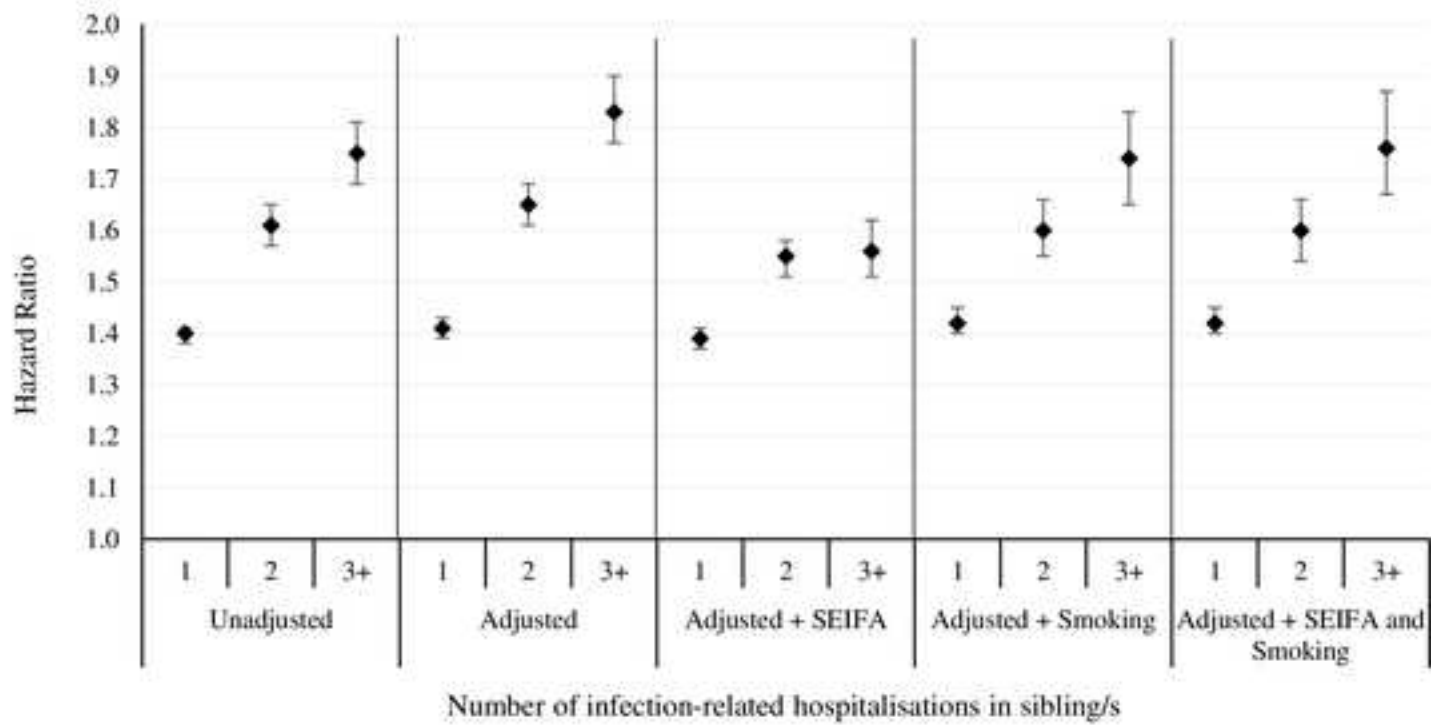

Figure 2B

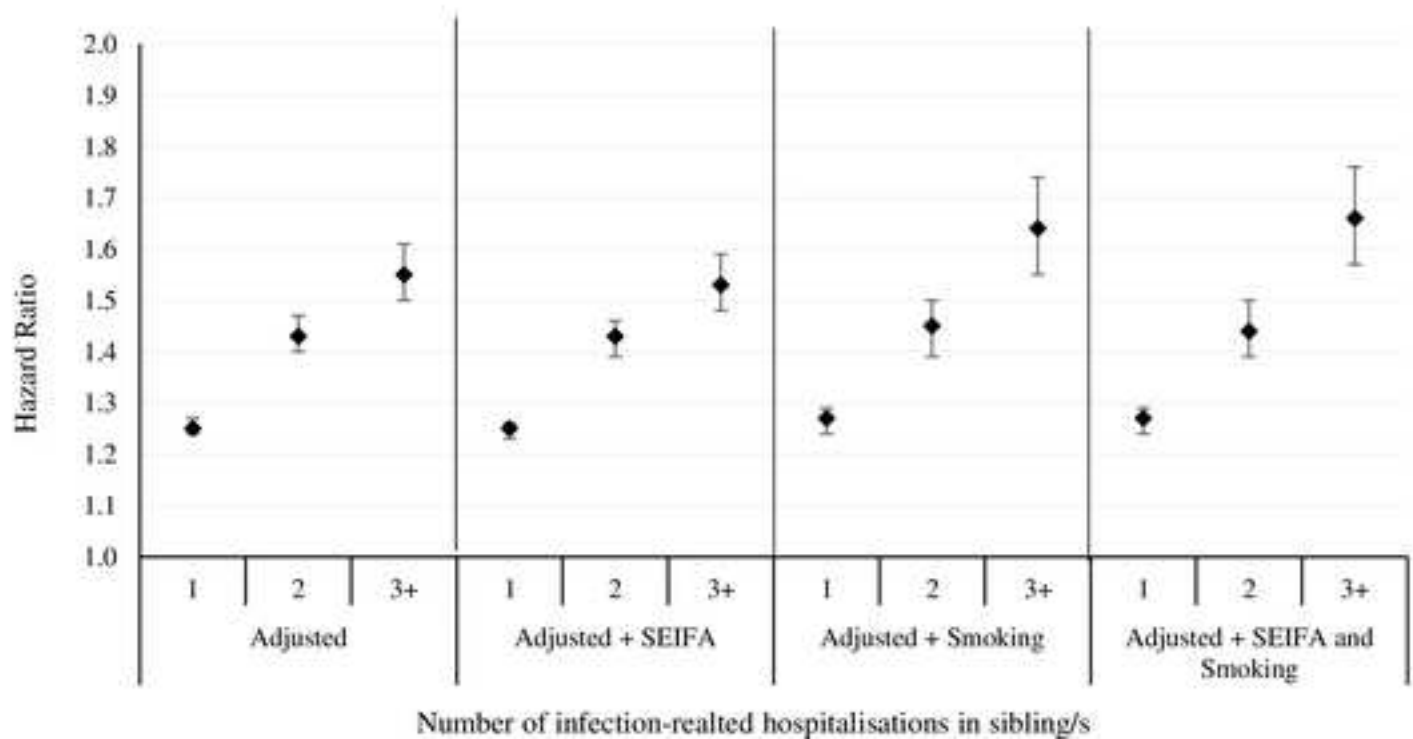

Figure 3

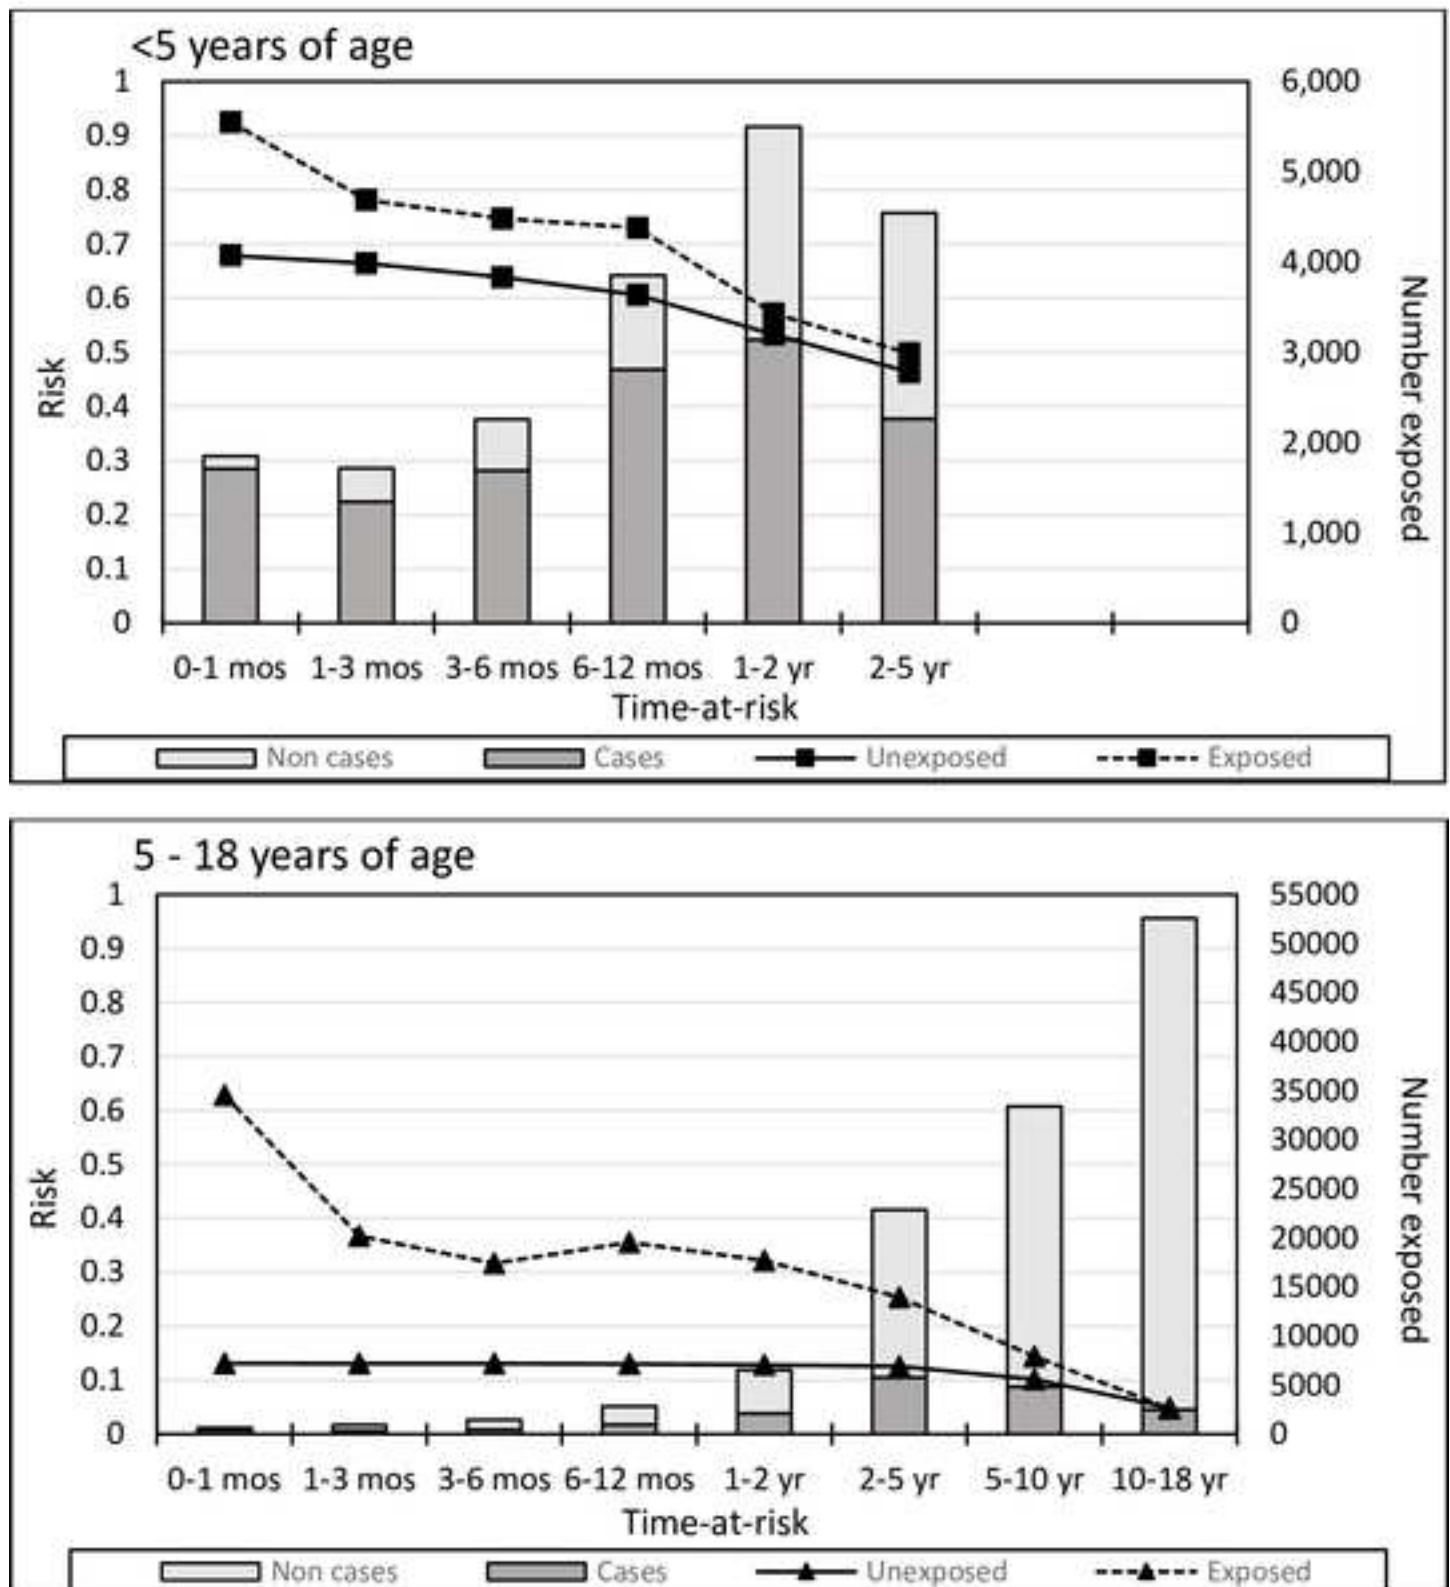

Figure 4A

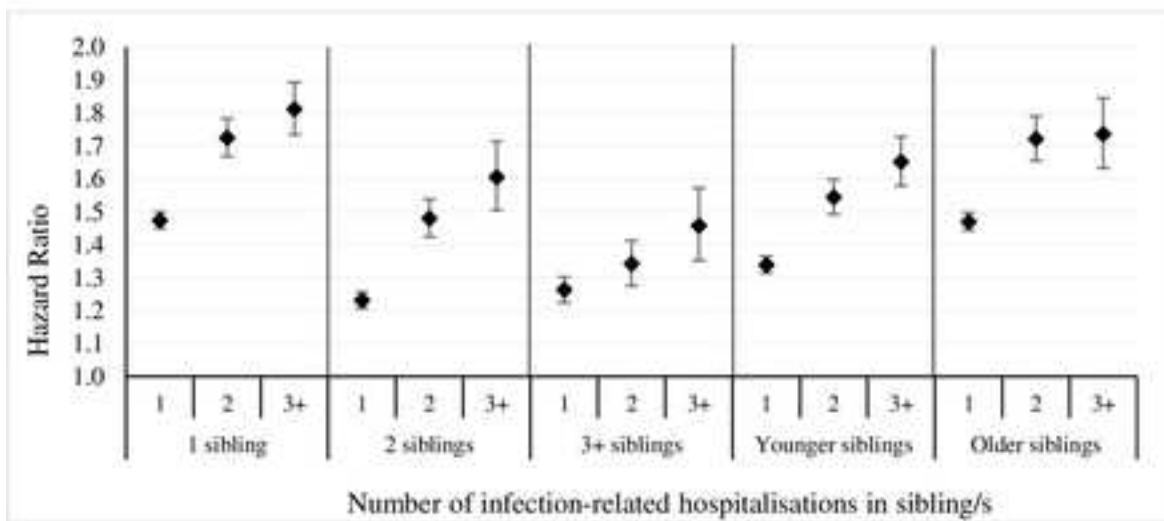

Figure 4B

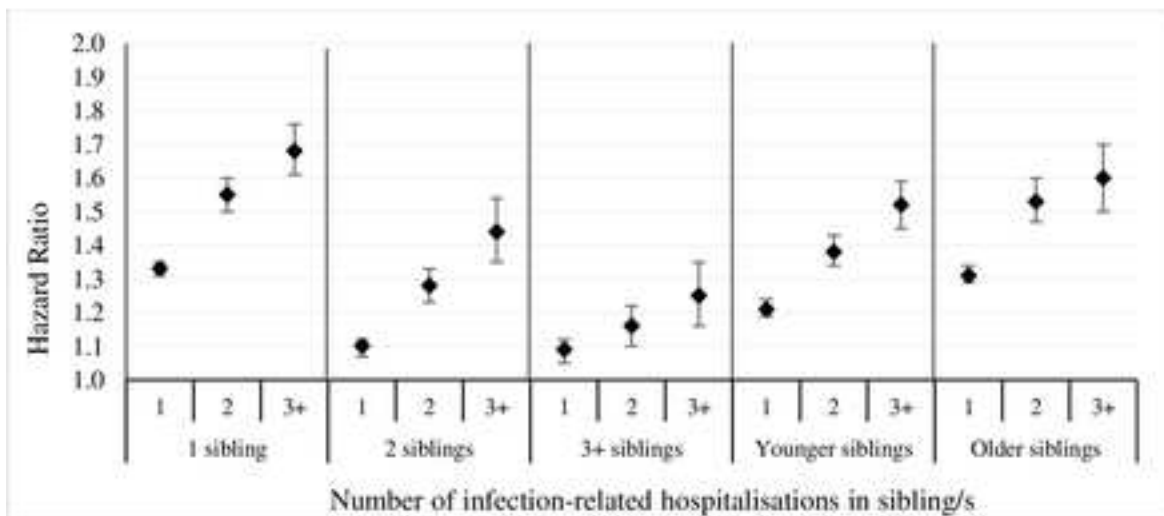

Figure 4C

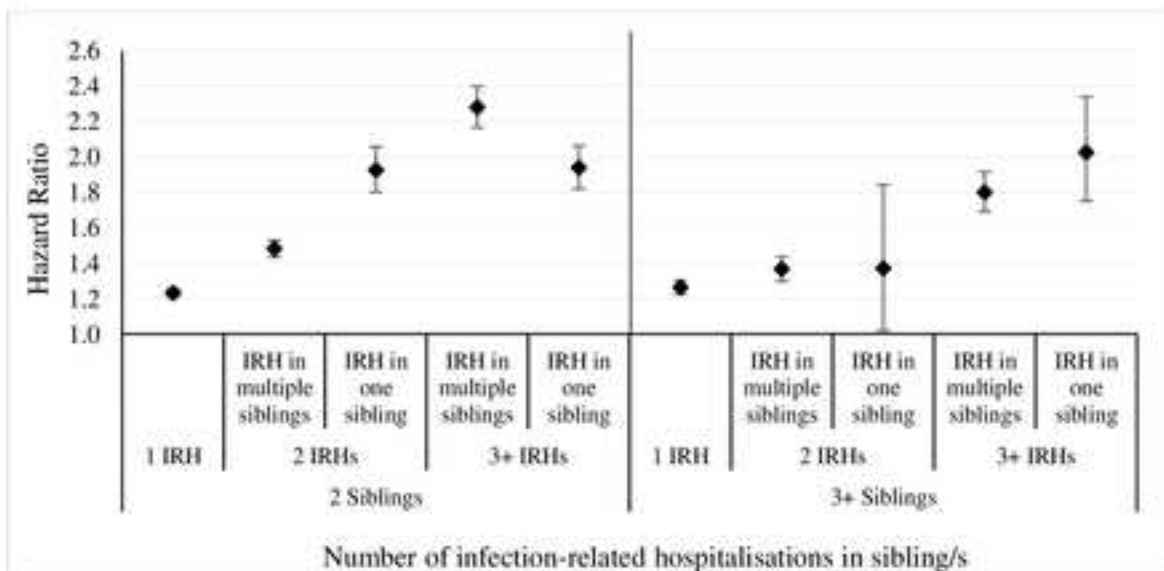

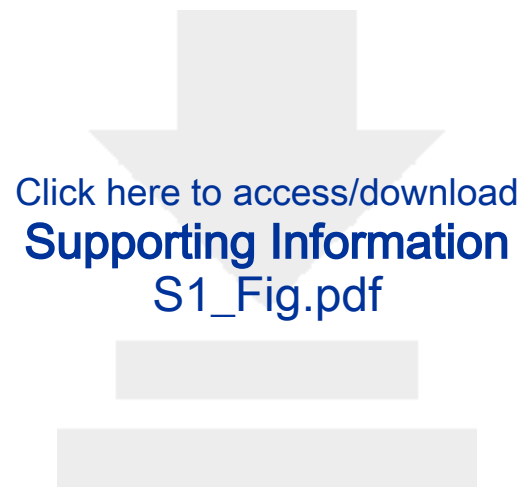

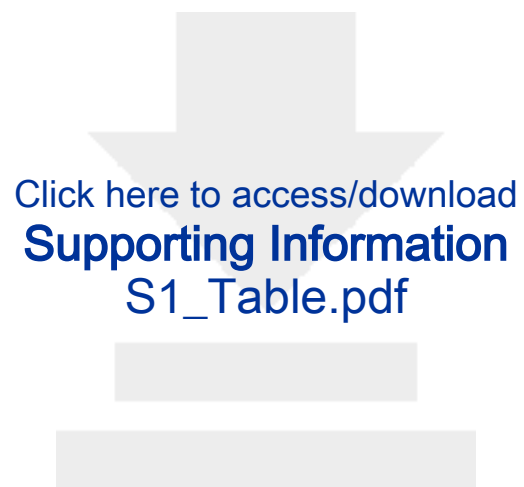

Click here to access/download  
**Supporting Information**  
S1\_Table.pdf

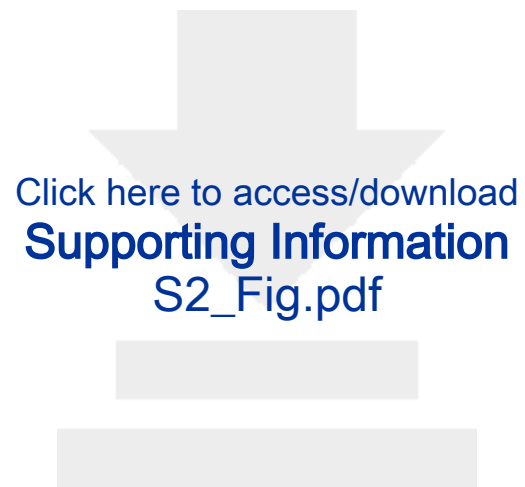

Click here to access/download  
**Supporting Information**  
S2\_Fig.pdf



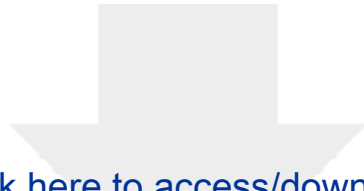

Click here to access/download

**Supporting Information**

STROBE\_checklist\_cohort.docx

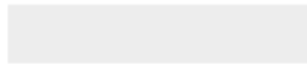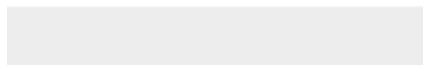

Supplement: pone.0250181.s005.pdf [file pone.0250181.s005.pdf]
