# Supplementary material for: The familial risk of infection-related hospitalization in children: A population-based sibling study
Source: PubMed Central journal article supplement (PMC8081236; doi:10.1371/journal.pone.0250181), 2021-04-28
Supplement: pone.0250181.s003.pdf [file pone.0250181.s003.pdf]

**S1 Table. Sensitivity analysis of infection-related hospitalization identification**

| MODEL                      | # of sibling infection-related hospitalizations | Infection-related hospitalizations identified by: |                                           |
|----------------------------|-------------------------------------------------|---------------------------------------------------|-------------------------------------------|
|                            |                                                 | (Original analysis)                               |                                           |
|                            |                                                 | Principal + up to 20 additional diagnostic codes  | Principal + 3 additional diagnostic codes |
| Crude                      | 1                                               | 1.40 (1.38-1.41)                                  | 1.40 (1.38-1.42)                          |
|                            | 2                                               | 1.61 (1.57-1.65)                                  | 1.60 (1.57-1.64)                          |
|                            | 3+                                              | 1.75 (1.69-1.81)                                  | 1.68 (1.62-1.74)                          |
| Adjusted                   | 1                                               | 1.41 (1.39-1.43)                                  | 1.41 (1.39-1.42)                          |
|                            | 2                                               | 1.65 (1.61-1.69)                                  | 1.64 (1.60-1.68)                          |
|                            | 3+                                              | 1.83 (1.77-1.90)                                  | 1.74 (1.68-1.81)                          |
| Adjusted + SEIFA           | 1                                               | 1.39 (1.37-1.41)                                  | 1.41 (1.39-1.42)                          |
|                            | 2                                               | 1.55 (1.51-1.58)                                  | 1.63 (1.59-1.67)                          |
|                            | 3+                                              | 1.56 (1.51-1.62)                                  | 1.73 (1.67-1.80)                          |
| Adjusted + smoking         | 1                                               | 1.42 (1.40-1.45)                                  | 1.45 (1.42-1.48)                          |
|                            | 2                                               | 1.60 (1.55-1.66)                                  | 1.69 (1.62-1.75)                          |
|                            | 3+                                              | 1.74 (1.65-1.83)                                  | 1.86 (1.75-1.97)                          |
| Adjusted + SEIFA + smoking | 1                                               | 1.42 (1.40-1.45)                                  | 1.45 (1.42-1.48)                          |
|                            | 2                                               | 1.60 (1.54-1.66)                                  | 1.69 (1.62-1.76)                          |
|                            | 3+                                              | 1.76 (1.67-1.87)                                  | 1.87 (1.76-1.99)                          |
| Adjusted 1 sibling         | 1                                               | 1.47 (1.45-1.50)                                  | 1.47 (1.45-1.50)                          |
|                            | 2                                               | 1.72 (1.67-1.78)                                  | 1.73 (1.67-1.79)                          |
|                            | 3+                                              | 1.81 (1.73-1.89)                                  | 1.81 (1.73-1.89)                          |
| Adjusted 2 siblings        | 1                                               | 1.23 (1.21-1.26)                                  | 1.25 (1.22-1.28)                          |
|                            | 2                                               | 1.48 (1.42-1.54)                                  | 1.47 (1.41-1.53)                          |
|                            | 3+                                              | 1.61 (1.5-1.71)                                   | 1.68 (1.56-1.79)                          |
| Adjusted 3 siblings        | 1                                               | 1.26 (1.22-1.3)                                   | 1.24 (1.19-1.28)                          |
|                            | 2                                               | 1.34 (1.28-1.41)                                  | 1.38 (1.30-1.46)                          |
|                            | 3+                                              | 1.46 (1.35-1.57)                                  | 1.44 (1.30-1.58)                          |

|                      |    |                  |                  |
|----------------------|----|------------------|------------------|
| All younger siblings | 1  | 1.34 (1.31-1.37) | 1.33 (1.30-1.36) |
|                      | 2  | 1.54 (1.49-1.6)  | 1.50 (1.45-1.56) |
|                      | 3+ | 1.65 (1.58-1.73) | 1.61 (1.54-1.70) |
| <hr/>                |    |                  |                  |
| All older siblings   | 1  | 1.47 (1.44-1.5)  | 1.49 (1.46-1.52) |
|                      | 2  | 1.72 (1.66-1.79) | 1.72 (1.65-1.79) |
|                      | 3+ | 1.74 (1.63-1.85) | 1.82 (1.71-1.94) |
| <hr/>                |    |                  |                  |
